# Supplementary material
Source: ML conference proceedings conference paper supplement (https://proceedings.neurips.cc/paper_files/paper/2019/hash/54e36c5ff5f6a1802925ca009f3ebb68-Abstract.html)
Supplement: Supplementary file [file 54e36c5ff5f6a1802925ca009f3ebb68-Supplemental.zip]

## A Additional Experiments

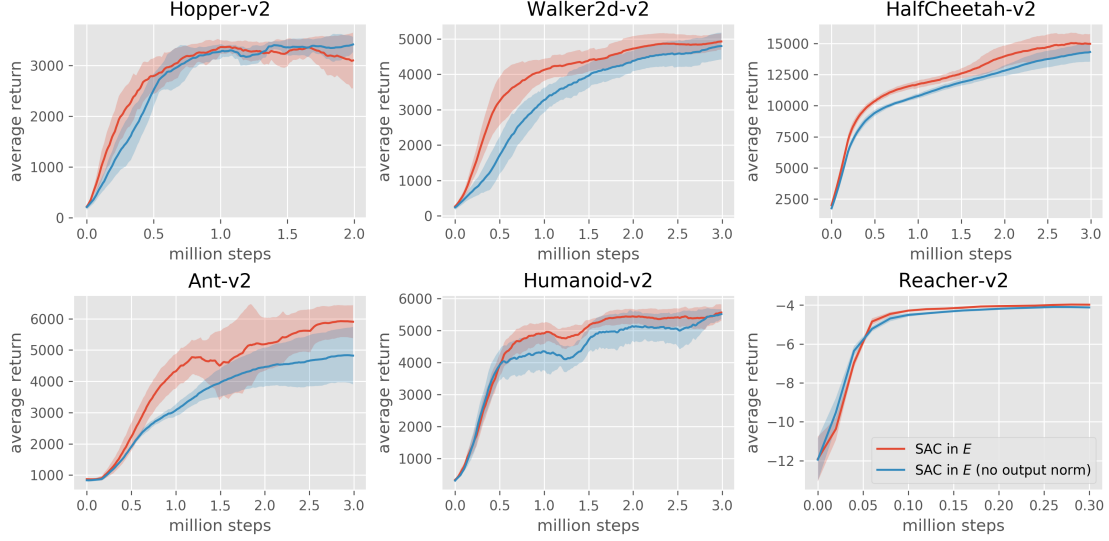

Figure 9: SAC with and without output normalization. SAC in  $E$  (no output norm) corresponds to the canonical version presented in Haarnoja et al. (2018a). Mean and 95% confidence interval are computed over eight training runs per environment.

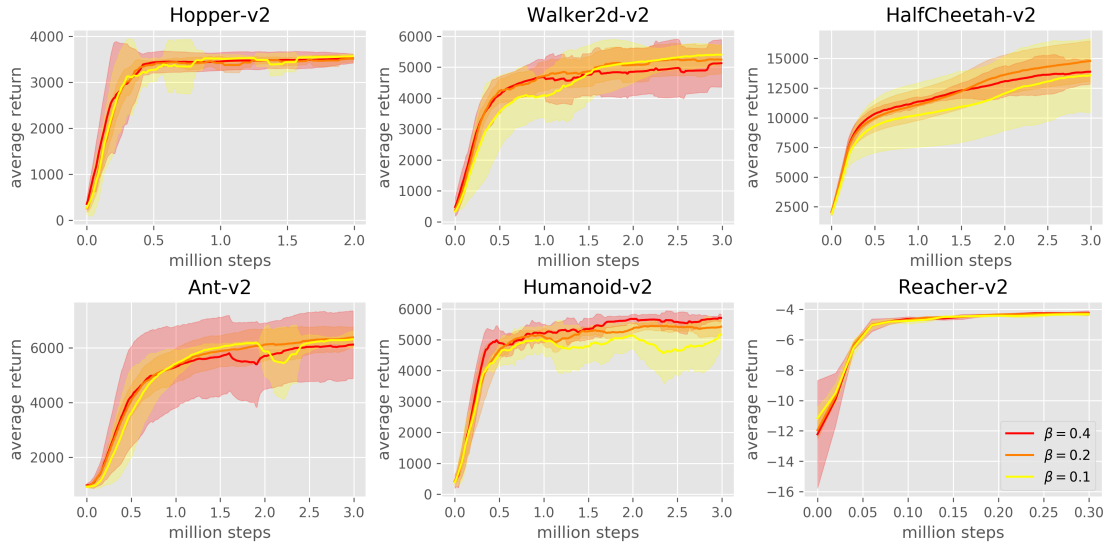

Figure 10: Comparison between different actor loss scales ( $\beta$ ). Mean and 95% confidence interval are computed over four training runs per environment.

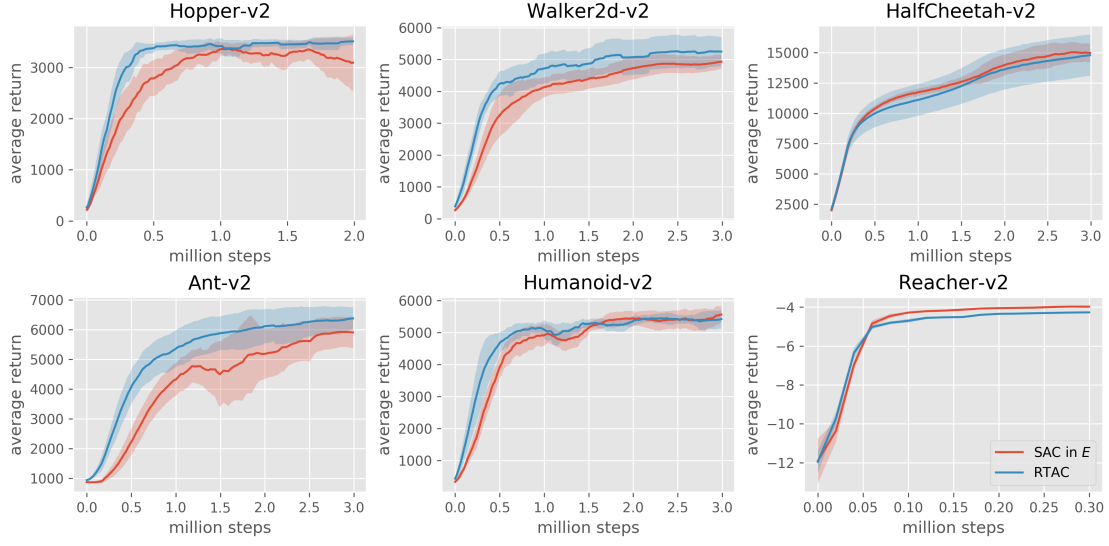

Figure 11: Comparison between RTAC (real-time) and SAC in  $E$  (turn-based). Mean and 95% confidence interval are computed over eight training runs per environment.

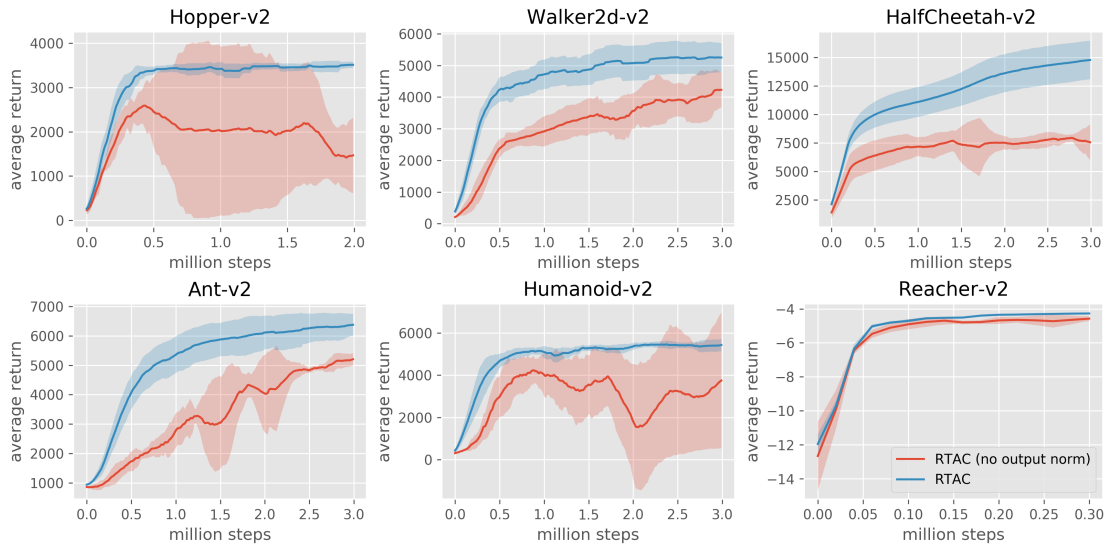

Figure 12: RTAC with and without output normalization. Mean and 95% confidence interval are computed over eight and four training runs per environment, respectively.

## B Hyperparameters

Table 1: Hyperparameters

| Name                                    | RTAC   | SAC                      |
|-----------------------------------------|--------|--------------------------|
| optimizer                               | Adam   | Adam (Kingma & Ba, 2014) |
| learning rate                           | 0.0003 | 0.0003                   |
| discount ( $\gamma$ )                   | 0.99   | 0.99                     |
| hidden layers                           | 2      | 2                        |
| units per layer                         | 256    | 256                      |
| samples per minibatch                   | 256    | 256                      |
| target smoothing coefficient ( $\tau$ ) | 0.005  | 0.005                    |
| gradient steps / environment steps      | 1      | 1                        |
| reward scale                            | 5      | 5                        |
| entropy scale ( $\alpha$ )              | 1      | 1                        |
| actor-critic loss factor ( $\beta$ )    | 0.2    | -                        |
| Pop-Art alpha                           | 0.0003 | -                        |
| start training after                    | 10000  | 10000 steps              |

## C Proofs

**Theorem 1.** <sup>4</sup> A policy  $\pi : A \times \mathbf{X} \rightarrow \mathbb{R}$  interacting with  $RTMDP(E)$  in the conventional, turn-based manner gives rise to the same Markov Reward Process as  $\pi$  interacting with  $E$  in real-time, i.e.

$$RTMRP(E, \pi) = TBMRP(RTMDP(E), \pi). \quad (3)$$

*Proof.* For any environment  $E = (S, A, \mu, p, r)$ , we want to show that the two above MRPs are the same. Per Def. 2 and 4 for  $TBMRP(RTMDP(E), \pi)$  we have

$$\begin{aligned}
(1) \text{ state space} & S \times A, \\
(2) \text{ initial distribution} & \mu(s)\delta(a - c), \\
(3) \text{ transition kernel} & \int_A p(s_{t+1}|s_t, a_t)\delta(a_{t+1} - \mathbf{a}) \pi(\mathbf{a}|s_t, a_t) d\mathbf{a}, \\
(4) \text{ state-reward function} & \int_A r(s, a) \pi(\mathbf{a}|s_t, a_t) d\mathbf{a}.
\end{aligned}$$

The transition kernel, using the definition of the Dirac delta function  $\delta$ , can be simplified to

$$p(s_{t+1}|s_t, a_t) \int_A \delta(a_{t+1} - \mathbf{a}) \pi(\mathbf{a}|s_t, a_t) d\mathbf{a} = p(s_{t+1}|s_t, a_t) \pi(a_{t+1}|s_t, a_t). \quad (15)$$

The state-reward function can be simplified to

$$r(s_t, a_t) \int_A \pi(\mathbf{a}|\mathbf{x}) d\mathbf{a} = r(s_t, a_t). \quad (16)$$

It should now be easy to see how the elements above match  $RTMRP(E, \pi)$ , Def. 3.  $\square$

---

<sup>4</sup>All proofs are in Appendix C.

**Theorem 2.** A policy  $\pi(\mathbf{a}|s, b, a) = \pi(\mathbf{a}|s)$  interacting with  $TBMDP(E)$  in real time, gives rise to a Markov Reward Process that contains (Def. 10) the MRP resulting from  $\pi$  interacting with  $E$  in the conventional, turn-based manner, i.e.

$$TBMRP(E, \pi) \propto RTMRP(TBMDP(E), \pi) \quad (4)$$

*Proof.* Given MDP  $E = (S, A, \mu, p, r)$ , we have  $\Psi = (Z, \nu, \sigma, \bar{\rho}) = RTMRP(TBMDP(E), \pi)$  with

$$(1) \text{ state space} \quad Z = S \times \{0, 1\} \times A, \quad (17)$$

$$(2) \text{ initial distribution} \quad \nu(s, b, a) = \mu(s) \delta(b) \delta(a - c), \quad (18)$$

$$(3) \text{ transition kernel} \quad \sigma(s_{t+1}, b_{t+1}, a_{t+1} | s_t, b_t, a_t) \quad (19)$$

$$= \begin{cases} \delta(s_{t+1} - s_t) \delta(b_{t+1} - 1) \pi(a_{t+1} | s_t) & \text{if } b_t = 0 \\ p(s_{t+1} | s_t, a_t) \delta(b_{t+1}) \pi(a_{t+1} | s_t) & \text{if } b_t = 1 \end{cases}, \quad (20)$$

$$(4) \text{ state-reward function} \quad \bar{\rho}(s, b, a) = r(s, a) b. \quad (21)$$

We can construct  $\Omega = (Z, \nu, \kappa, \bar{\mathbf{r}})$ , a sub-MRP with interval  $n = 2$ . Since we always skip the step in which  $b = 1$ , we only have to define the transition kernel for  $b_t = 0$ , i.e.

$$\kappa(z_{t+1} | z_t) = \sigma^2(s_{t+1}, b_{t+1}, a_{t+1} | s_t, b_t, a_t) \quad (22)$$

$$= \int_{S \times A} \sigma(s_{t+1}, b_{t+1}, a_{t+1} | s', 1, a') \sigma(s', 1, a' | s_t, 0, a_t) d(s', a') \quad (23)$$

$$= \int_{S \times A} p(s_{t+1} | s', a') \delta(b_{t+1}) \pi(a_{t+1} | s') \delta(s' - s_t) \pi(a' | s_t) d(s', a') \quad (24)$$

$$= \int_A p(s_{t+1} | s_t, a') \delta(b_{t+1}) \pi(a' | s_t) da'. \quad (25)$$

For the state-reward function we have (again only considering  $b = 0$ )

$$\bar{\mathbf{r}}(s, b, a) = v_\Psi^2(s, b, a) \quad (26)$$

$$= \underbrace{\bar{\rho}(s, 0, a)}_{=0} + \int_{S \times A} \bar{\rho}(s', 1, a') \sigma(s', 1, a' | s, 0, a) d(s', a') \quad (27)$$

$$= \int_{S \times A} r(s', a') \delta(s' - s) \pi(a' | s) d(s', a') \quad (28)$$

$$= \int_A r(s, a') \pi(a' | s) da'. \quad (29)$$

The sub-MRP  $\Omega$  is already very similar to  $TBMRP(E, \pi)$  except for having a larger state-space. To get rid of the  $b$  and  $a$  state components, we reduce  $\Omega$  with a state transformation  $f(s, b, a) = s$ . The reduced MRP has

$$(1) \text{ state space} \quad \{f(z) : z \in Z\} = S, \quad (30)$$

$$(2) \text{ initial distribution} \quad \int_{f^{-1}(s)} \nu(z) dz = \int_{\{s\} \times \{0, 1\} \times A} \mu(s) \delta(b) \delta(a - c) d(s, b, a) = \mu(s), \quad (31)$$

$$(3) \text{ transition kernel} \quad \int_{f^{-1}(s_{t+1})} \kappa(z' | z) dz' \text{ for almost all } z \in f^{-1}(s_t) \quad (32)$$

$$= \int_{\{s_{t+1}\} \times \{0, 1\} \times A} \kappa(z' | z) dz' \text{ for almost all } z \in \{s_t\} \times \{0, 1\} \times A \quad (33)$$

$$= \int_A p(s_{t+1} | s_t, a') \pi(a' | s_t) da' \quad (34)$$

$$(4) \text{ state-reward function} \quad \bar{\mathbf{r}}(z) \text{ for almost all } z \in f^{-1}(s). \quad (35)$$

$$= \int_A r(s, a') \pi(a' | s) da', \quad (36)$$

which is exactly  $TBMRP(E, \pi)$ .  $\square$

**Lemma 1.** In a Real-Time Markov Decision Process for the action-value function we have

$$q_{RTMDP(E)}^\pi(s_t, a_t, \mathbf{a}_t) = r(s_t, a_t) + \mathbb{E}_{s_{t+1} \sim p(\cdot | s_t, a_t)} [\mathbb{E}_{\mathbf{a}_{t+1} \sim \pi(\cdot | s_{t+1}, \mathbf{a}_t)} [q_{RTMDP(E)}^\pi(s_{t+1}, \mathbf{a}_t, \mathbf{a}_{t+1})]] \quad (6)$$

*Proof.* After starting with the definition of the action-value function for an environment  $(X, A, \mu, p, r) = RTMDP(E)$  with  $E = (S, A, \mu, p, r)$ , we separate the transition distribution  $p$  into its two constituents  $p$  and  $\delta$  and then, integrate over the Dirac delta.

$$q_{RTMDP(E)}^\pi(s_t, \mathbf{a}_t) = q_{RTMDP(E)}^\pi(s_t, a_t, \mathbf{a}_t) \quad (37)$$

$$= r(s_t, a_t, \mathbf{a}_t) + \mathbb{E}_{s_{t+1}, \mathbf{a}_{t+1} \sim p(\cdot | s_t, a_t, \mathbf{a}_t)} [\underbrace{\mathbb{E}_{\mathbf{a}_{t+1} \sim \pi(\cdot | s_{t+1}, \mathbf{a}_{t+1})} [q_{RTMDP(E)}^\pi(s_{t+1}, \mathbf{a}_{t+1}, \mathbf{a}_{t+1})]}_{(38)}] \quad (38)$$

$$= r(s_t, a_t) + \int_S p(s_{t+1} | s_t, a_t) \int_A \delta(a_{t+1} - \mathbf{a}_t) \dots da_{t+1} ds_{t+1} \quad (39)$$

$$= r(s_t, a_t) + \int_S p(s_{t+1} | s_t, a_t) \mathbb{E}_{\mathbf{a}_{t+1} \sim \pi(\cdot | s_{t+1}, \mathbf{a}_t)} [q_{RTMDP(E)}^\pi(s_{t+1}, \mathbf{a}_t, \mathbf{a}_{t+1})] ds_{t+1} \quad (40)$$

□

**Lemma 2.** In a Real-Time Markov Decision Process for the state-value function we have

$$v_{RTMDP(E)}^\pi(s_t, a_t) = r(s_t, a_t) + \mathbb{E}_{s_{t+1} \sim p(\cdot | s_t, a_t)} [\mathbb{E}_{\mathbf{a}_t \sim \pi(\cdot | s_t, a_t)} [v_{RTMDP(E)}^\pi(s_{t+1}, \mathbf{a}_t)]] \quad (8)$$

*Proof.* We follow the same procedure as for Lemma 1.

$$v_{RTMDP(E)}^\pi(\mathbf{x}_t) = v_{RTMDP(E)}^\pi(s_t, a_t) \quad (41)$$

$$= \mathbb{E}_{\mathbf{a}_t \sim \pi(\cdot | s_t, a_t)} [r(s_t, a_t, \mathbf{a}_t) + \mathbb{E}_{s_{t+1}, \mathbf{a}_{t+1} \sim p(\cdot | s_t, a_t, \mathbf{a}_t)} [v_{RTMDP(E)}^\pi(s_{t+1}, \mathbf{a}_{t+1})]] \quad (42)$$

$$= r(s_t, a_t) + \mathbb{E}_{\mathbf{a}_t \sim \pi(\cdot | s_t, a_t)} [\int_S p(s_{t+1} | s_t, a_t) \int_A \delta(a_{t+1} - \mathbf{a}_t) v_{RTMDP(E)}^\pi(s_{t+1}, \mathbf{a}_{t+1}) da_{t+1} ds_{t+1}] \quad (43)$$

$$= r(s_t, a_t) + \int_S p(s_{t+1} | s_t, a_t) \mathbb{E}_{\mathbf{a}_t \sim \pi(\cdot | s_t, a_t)} [v_{RTMDP(E)}^\pi(s_{t+1}, \mathbf{a}_t)] ds_{t+1} \quad (44)$$

□

**Proposition 1.** The following policy loss based on the state-value function

$$L_{RTMDP(E), \pi}^{RTAC} = \mathbb{E}_{(s_t, a_t) \sim D} \mathbb{E}_{s_{t+1} \sim p(\cdot | s_t, a_t)} D_{KL}(\pi(\cdot | s_t, a_t) || \exp(\frac{1}{\alpha} \gamma v(s_{t+1}, \cdot)) / Z(s_{t+1})) \quad (10)$$

has the same policy gradient as  $L_{RTMDP(E), \pi}^{SAC}$ , i.e.

$$\nabla_{\pi} L_{RTMDP(E), \pi}^{RTAC} = \nabla_{\pi} L_{RTMDP(E), \pi}^{SAC} \quad (11)$$

*Proof.* As shown in Haarnoja et al. (2018a), Equation 9 can be reparameterized to obtain the policy gradient, which, applied in a RTMDP, yields

$$\nabla_{\pi} L_{RTMDP(E), \pi}^{SAC} = \mathbb{E}_{\mathbf{x}_t, \epsilon} [\nabla_{\pi} (\log \pi(\mathbf{h}_{\pi}(\mathbf{x}_t, \epsilon), \mathbf{x}_t) - \frac{1}{\alpha} \gamma v(\mathbf{x}_t, \mathbf{h}_{\pi}(\mathbf{x}_t, \epsilon)))] \quad (45)$$

and reparameterizing Equation 10 yields

$$\nabla_{\pi} L_{RTMDP(E), \pi}^{RTAC} = \mathbb{E}_{\mathbf{x}_t, \epsilon} [\nabla_{\pi} (\log \pi(\mathbf{h}_{\pi}(\mathbf{x}_t, \epsilon), \mathbf{x}_t) - \frac{1}{\alpha} \gamma \nabla_{\pi} \mathbb{E}_{s_{t+1} \sim p(\cdot | \mathbf{x}_t)} [v(s_{t+1}, \mathbf{h}_{\pi}(\mathbf{x}_t, \epsilon))])] \quad (46)$$

where  $\mathbf{h}_{\pi}$  is a function mapping from state and noise to an action distributed according to  $\pi$ . This leaves us to show that

$$\nabla_{\mathbf{a}_t} q(\mathbf{x}_t, \mathbf{a}_t) = \underbrace{\nabla_{\mathbf{a}_t} r(\mathbf{x}_t, \mathbf{a}_t)}_{=0} + \nabla_{\mathbf{a}_t} \gamma \mathbb{E}_{s_{t+1} \sim p(\cdot | \mathbf{x}_t, \mathbf{a}_t)} [v(\mathbf{x}_{t+1})] = \gamma \nabla_{\mathbf{a}_t} \mathbb{E}_{s_{t+1} \sim p(\cdot | \mathbf{x}_t)} [v(s_{t+1}, \mathbf{a}_t)] \quad (47)$$

which follows from the definition of the soft action-value function and simplifying quantities defined in the RTMDP. □

## D Definitions

**Definition 7.** A Turn-Based Markov Decision Process  $(Z, A, \nu, q, \rho) = \text{TBMDP}(E)$  augments another Markov Decision Process  $E = (S, A, \mu, p, r)$ , such that

- (1) state space  $Z = S \times \{0, 1\}$ ,
- (2) action space  $A$ ,
- (3) initial state distribution  $\nu(s_0, b_0) = \mu(s_0) \delta(b_0)$ ,
- (4) transition distribution  $q(s_{t+1}, b_{t+1} | s_t, b_t, a_t) = \begin{cases} \delta(s_{t+1} - s_t) \delta(b_{t+1} - 1) & \text{if } b_t = 0 \\ p(s_{t+1} | s_t, a_t) \delta(b_{t+1}) & \text{if } b_t = 1 \end{cases}$
- (5) reward function  $\rho(s, b, a) = r(s, a) b$ .

**Definition 8.**  $\Omega = (Z, \nu, \kappa, \bar{r})$  is a sub-MRP of  $\Psi = (Z, \nu, \sigma, \bar{\rho})$  if its states are sub-sampled with interval  $n \in \mathbb{N}$  and rewards are summed over each interval, i.e. for almost all  $z$

$$\kappa(z' | z) = \kappa^n(z' | z) \quad \text{and} \quad \bar{r}(z) = v_\Psi^n(z). \quad (48)$$

**Definition 9.** A MRP  $\Omega = (S, \mu, \kappa, \bar{r})$  is a reduction of  $\Omega = (Z, \nu, \kappa, \bar{r})$  if there is a state transformation  $f : Z \rightarrow S$  that neither affects the evolution of states nor the rewards, i.e.

$$(1) \text{ state space} \quad S = \{f(z) : z \in Z\}, \quad (49)$$

$$(2) \text{ initial distribution} \quad \mu(s) = \int_{f^{-1}(s)} \nu(z) dz, \quad (50)$$

$$(3) \text{ transition kernel} \quad \kappa(s_{t+1} | s) = \int_{f^{-1}(s_{t+1})} \kappa(z' | z) dz' \text{ for almost all } z \in f^{-1}(s), \quad (51)$$

$$(4) \text{ state-reward function} \quad r(s) = \bar{r}(z) \text{ for almost all } z \in f^{-1}(s). \quad (52)$$

**Definition 10.** A MRP  $\Psi$  contains another MRP  $\Omega$  (we write  $\Omega \propto \Psi$ ) if  $\Psi$  works at a higher frequency and has a richer state than  $\Psi$  but behaves otherwise identically. More precisely,

$$\Omega \propto \Psi \iff \Omega \text{ is a reduction (Def. 9) of a sub-MRP (Def. 8) of } \Psi. \quad (53)$$

**Definition 11.** The  $n$ -step transition function of a MRP  $\Omega = (S, \mu, \kappa, \bar{r})$  is

$$\kappa^n(s_{t+n} | s_t) = \int_S \kappa(s_{t+n} | s_{t+n-1}) \kappa^{n-1}(s_{t+n-1} | s_t) ds_{t+n-1}. \quad | \text{ with } \kappa^1 = \kappa \quad (54)$$

**Definition 12.** The  $n$ -step value function  $v_\Omega^n$  of a MRP  $\Omega = (S, \mu, \kappa, \bar{r})$  is

$$v_\Omega^n(s_t) = \bar{r}(s_t) + \int_S \kappa(s_{t+1} | s_t) v_\Omega^{n-1}(s_{t+1}) ds_{t+1}. \quad | \text{ with } v_\Omega^1 = \bar{r} \quad (55)$$
